# Supplementary material for: Hydrophobicity controls guest uptake in Rh8metallacages
Source: Royal Society of Chemistry journal article supplement (doi:10.1039/d0nj02529a), 2020-01-01
Supplement: d0nj02529a1.pdf [file d0nj02529a1.pdf]

Supporting information for

## Hydrophobicity Controls Guest Uptake Rh<sub>8</sub> Metallacages

Wei-Bin Yu<sup>\*a</sup>, Feng-Yi Qiu<sup>a</sup>, Zhi-Feng Xin<sup>a</sup>, and Sun Po<sup>a</sup>

Analysis and Testing Central Facility, Engineering Research Institute, Anhui University of  
Technology, Maanshan 243002, P. R. China.

E-mail: yuweibin@ahut.edu.cn

### Contents

1. General Methods
2. Experimental Procedures
3. NMR Spectra
4. X-Ray Crystallographic Details
5. References

## 1. General Methods

All reagents and solvents were purchased from commercial sources and used as supplied unless otherwise mentioned. The starting material  $[\text{Cp}^*\text{RhCl}_2]_2$  ( $\text{Cp}^* = \eta^5\text{-pentamethylcyclopentadienyl}$ ) was prepared by the literature method.<sup>1</sup> NMR spectra were recorded on Bruker AVANCE I 400 at room temperature and referenced to the residual protonated solvent for NMR spectra. Proton chemical shift  $\delta \text{H} = 7.26$  ( $\text{CDCl}_3$ ),  $\delta \text{H} = 3.31$  ( $\text{CD}_3\text{OD}$ ) are reported relative to the solvent residual peak. Elemental analyses were performed on an Elementar Vario EL III analyzer. IR spectra of the solid samples (KBr tablets) in the range  $400\text{--}4000\text{ cm}^{-1}$  were recorded on a Nicolet AVATAR-360IR spectrometer. UV spectra were recorded on a UV-VIS-NIR Spectrophotometer UV-3600 purchased from SHIMADZU in the range  $185\text{--}3300\text{ nm}$  in solution.

## 2. Experimental Procedures

### Synthesis of cage 1

AgOTf (25.7 mg, 0.1 mmol) was added to a solution of [Cp\*RhCl<sub>2</sub>]<sub>2</sub> (62.0 mg, 0.1 mmol) in CH<sub>3</sub>OH (10 mL) at room temperature. The reaction mixture was stirred in the dark for 6 h and then filtered, followed by addition of 4,4',4'',4'''-(1,2-ethenediylidenetetra-4,1-phenylene)tetrakis-Pyridine (EPTP), (32.0 mg, 0.05 mmol) and 2,5-Dichloro-3,6-Dihydroxy-*p*-Benzoquinone (20.8 mg, 0.1 mmol) with sodium hydroxide (8.0 mg, 0.2 mmol). After stirring for another 12 h at room temperature, the reaction mixture was concentrated to a volume of 3 mL under reduced pressure, filtered through celite and recrystallized by slow diffusion of diethyl ether into the filtrate. A brown crystalline solid (124.0 mg) was obtained in 78.0% yield. <sup>1</sup>H NMR (400 MHz, d<sub>4</sub>-CD<sub>3</sub>OD, ppm) δ = 8.35 (d, J = 8.0 Hz, 16H, pyridyl-ligand), 7.76 (d, J = 8.0 Hz, 16H, pyridyl-ligand), 7.51 (d, J = 8.0 Hz, 16H, phenyl-ligand), 7.17 (d, J = 8.0 Hz, 16H phenyl-ligand), 1.74 (s, 120H, methyl-Cp\*); Elemental analysis calcd (%) for chemical formula: C<sub>300</sub>H<sub>184</sub>Cl<sub>8</sub>F<sub>24</sub>N<sub>8</sub>O<sub>40</sub>Rh<sub>8</sub>S<sub>8</sub>: C, 56.66; H, 2.92; N, 1.76; Found: C, 56.45; H, 2.84; N, 1.71. IR (KBr cm<sup>-1</sup>): 3474, 3461, 2920, 1611, 1494, 1370, 1256, 1158, 1075, 1028, 854, 822, 752, 638.

### Guest uptake and binding constants (*K*) test

The guests (0.005 mmol for **G2**, 0.003 mmol for **G2**, 0.005 mmol for **G3**) and the cage (0.001 mmol) were mixed into NMR tube CD<sub>3</sub>OD, treated in ultrasonic instrument for some time. Their processes of uptake guests in host were monitored by <sup>1</sup>H NMR every several minutes. According to the results detected by <sup>1</sup>H NMR, the *K* values were calculated by the following equations:<sup>2</sup>

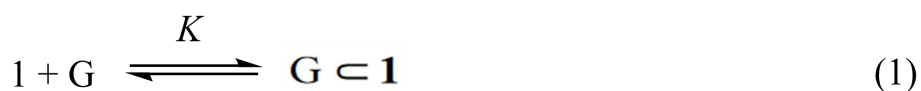

$$K = \frac{[G \subset 1]}{([1] - [G \subset 1])([G] - [G \subset 1])} \quad (2)$$

### 3. NMR Spectra

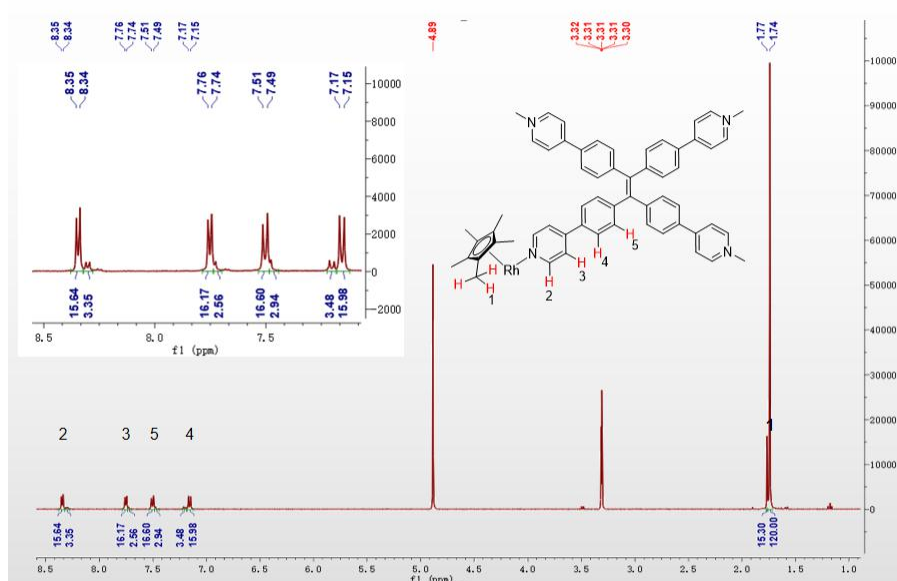

Fig. s1.  $^1\text{H}$  NMR spectrum of **1** in  $\text{CD}_3\text{OD}$ .

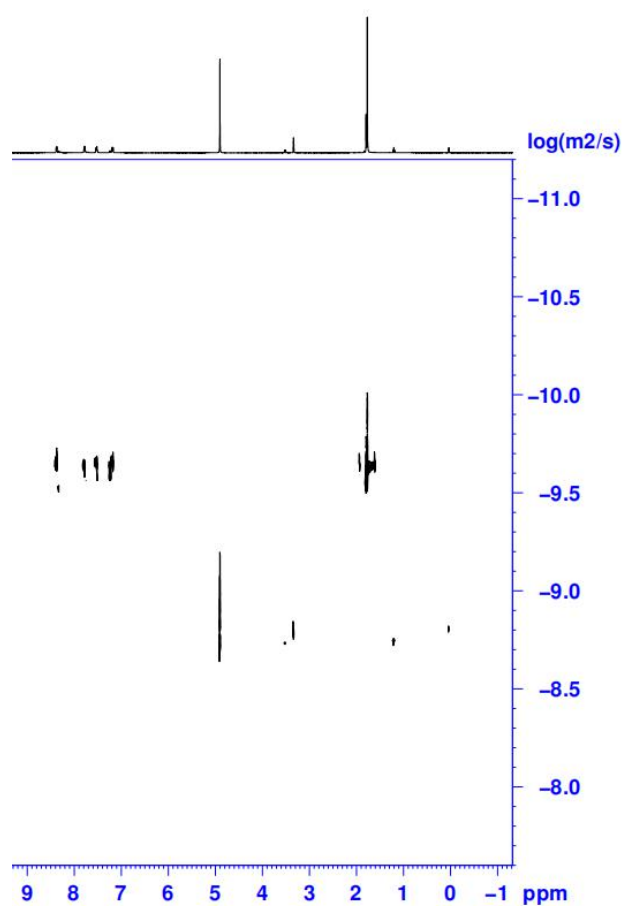

Fig. s2.  $^1\text{H}$ - $^1\text{H}$  DOSY NMR spectrum of **1** in  $\text{CD}_3\text{OD}$ .

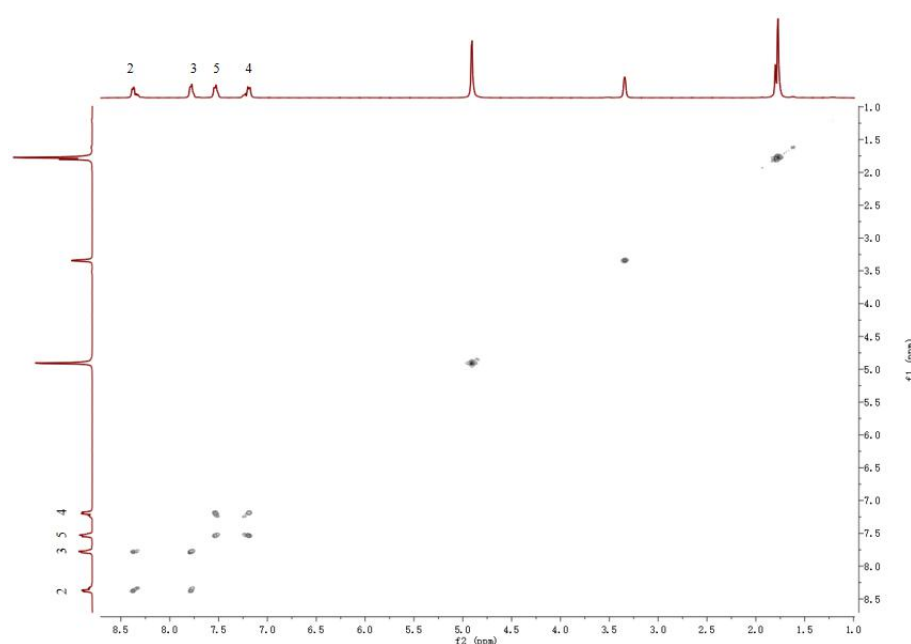

Fig. s3. 2D  $^1\text{H}$ - $^1\text{H}$  COSY NMR spectrum of **1** in  $\text{CD}_3\text{OD}$ .

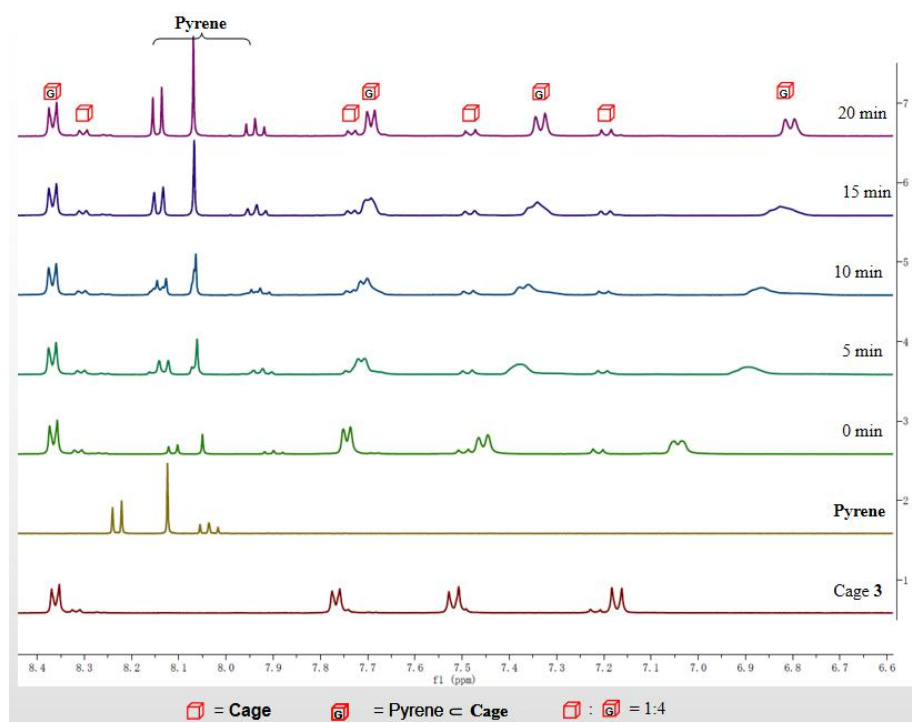

Fig. s4. Self-assembly processes of Pyrene-encapsulating Cage **1** determined by  $^1\text{H}$  NMR.

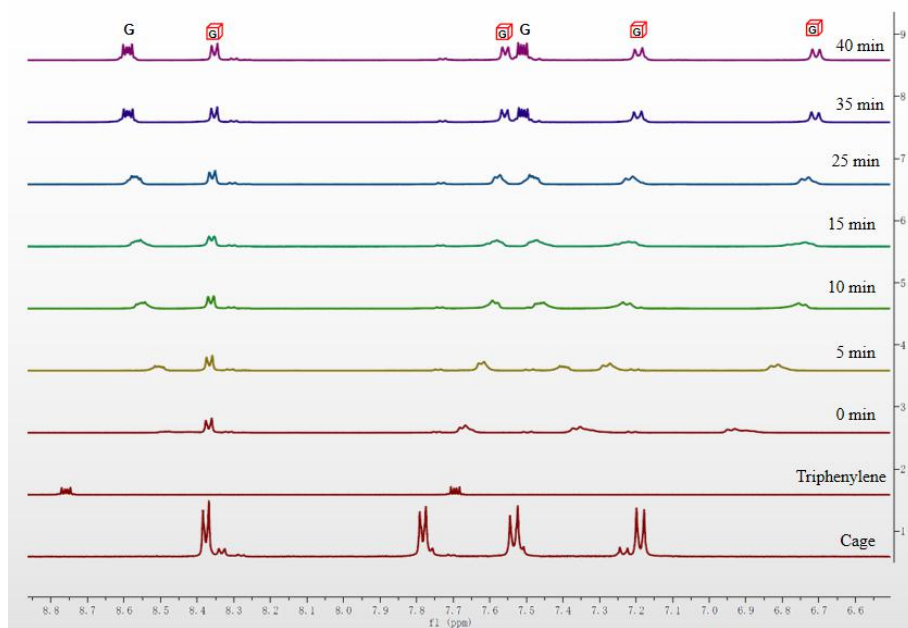

Fig. s5. Self-assembly processes of triphenylene-encapsulating Cage **1** determined by  $^1\text{H}$  NMR.

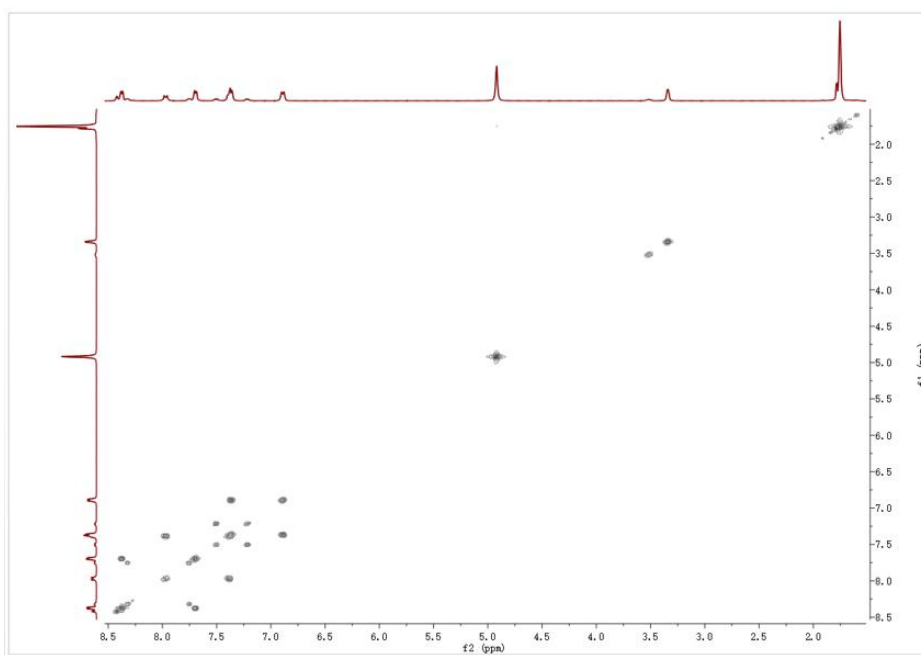

Fig. s6.  $^1\text{H}$ - $^1\text{H}$  2D COSY NMR spectra of Anthracene-encapsulating Cage **1**.

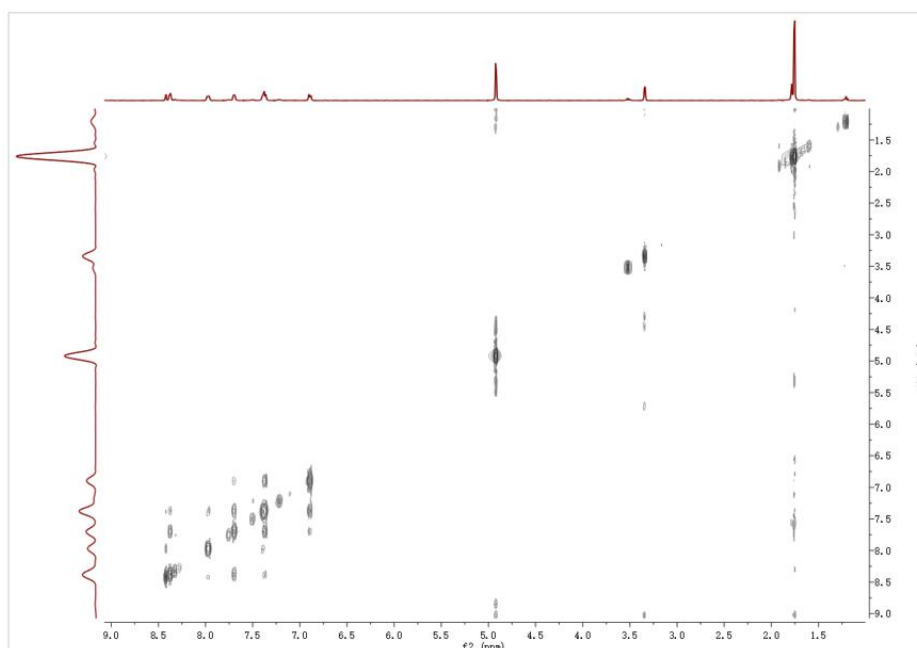

Fig. s7. <sup>1</sup>H-<sup>1</sup>H 2D NOESY NMR spectra of Anthracene-encapsulating Cage **1**.

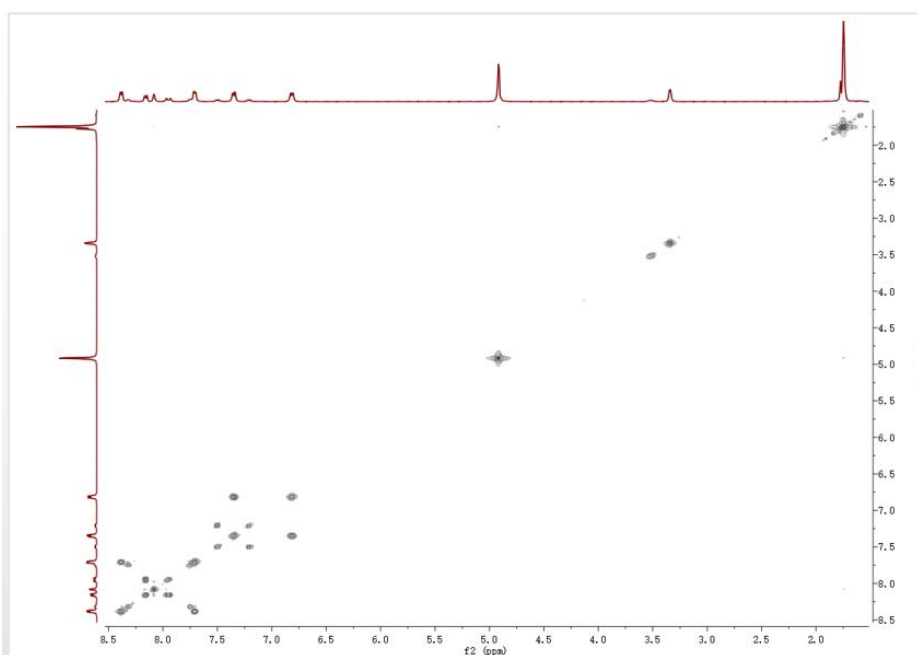

Fig. s8. <sup>1</sup>H-<sup>1</sup>H 2D COSY NMR spectra of Pyrene-encapsulating Cage **1**.

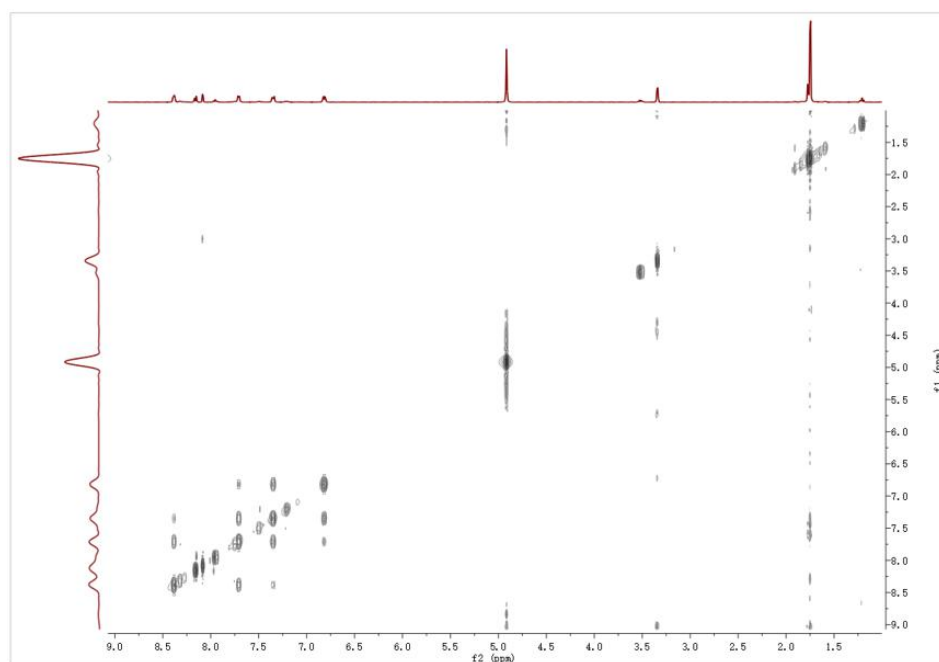

Fig. s9. <sup>1</sup>H-<sup>1</sup>H 2D NOESY NMR spectra of Pyrene-encapsulating Cage **1**.

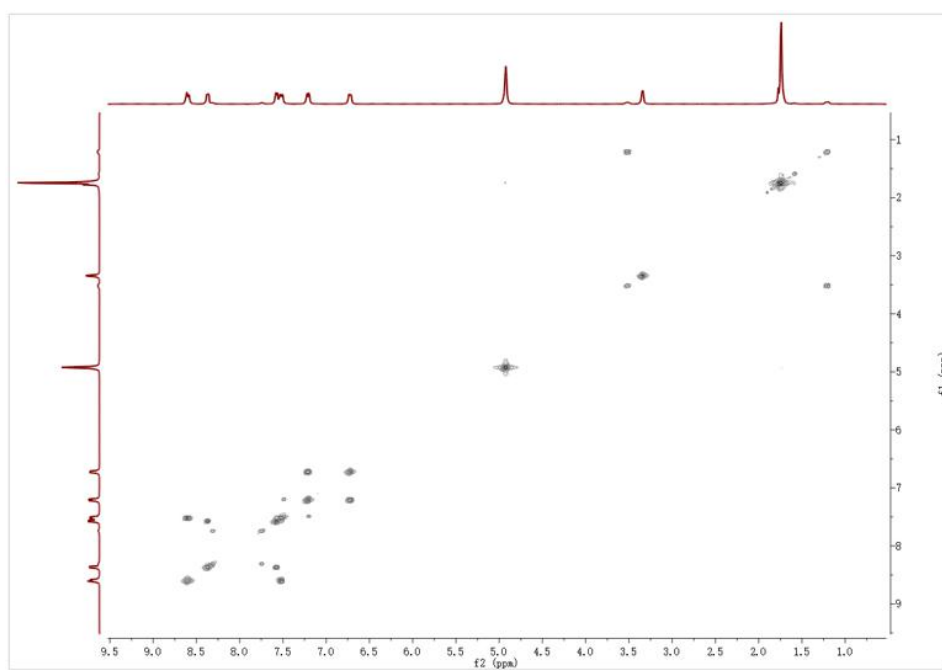

Fig. s10. <sup>1</sup>H-<sup>1</sup>H 2D COSY NMR spectra of Triphenylene-encapsulating Cage **1**.

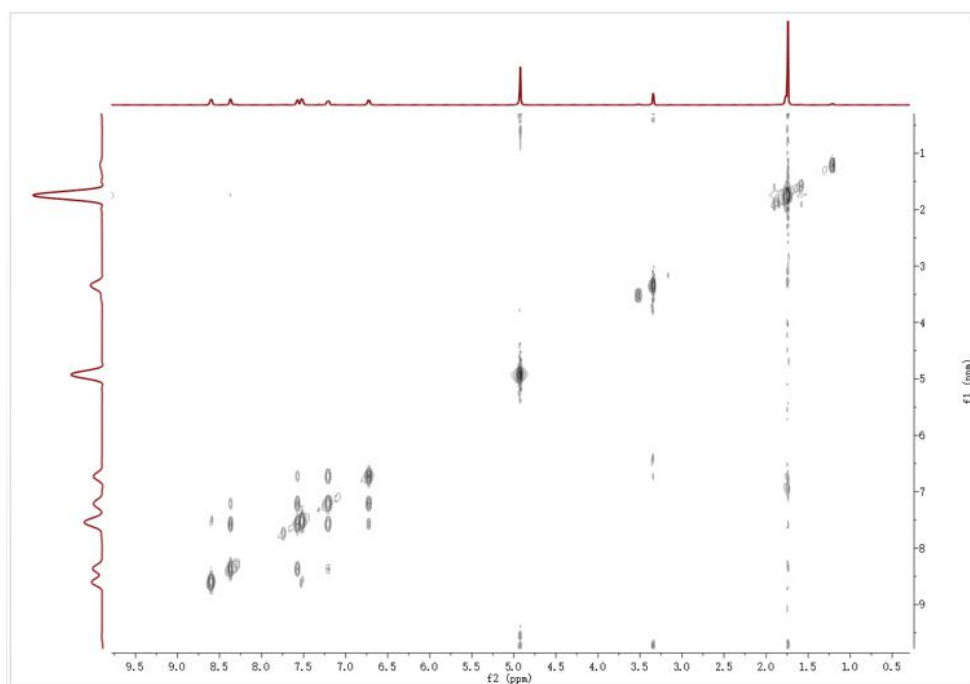

Fig. s11. <sup>1</sup>H-<sup>1</sup>H 2D NOESY NMR spectra of Triphenylene-encapsulating Cage **1**.

#### 4.X-Ray Crystallographic Details

Table s1. Crystal data of **1**.

| Page 1                                      |                       |
|---------------------------------------------|-----------------------|
| <i>Formula</i>                              |                       |
| $M_r$                                       | 5204.93               |
| $T$ [K]                                     | 193                   |
| <i>Crystal system</i>                       | triclinic             |
| <i>Space group</i>                          | P-1                   |
| $a$ [Å]                                     | 16.8448(18)           |
| $b$ [Å]                                     | 18.457(2)             |
| $c$ [Å]                                     | 25.850(3)             |
| $\alpha$ [°]                                | 96.150(5)             |
| $\beta$ [°]                                 | 102.186(5)            |
| $\gamma$ [°]                                | 99.661(5)             |
| $V$ [Å <sup>3</sup> ]                       | 7659.5(15)            |
| $Z$                                         | 1                     |
| $\rho_{\text{calcd}}$ [g cm <sup>-3</sup> ] | 1.128                 |
| $F(000)$                                    | 2622                  |
| <i>Crystal size</i> [mm <sup>3</sup> ]      | 0.180 × 0.160 × 0.140 |
| $2\theta_{\text{max}}$ [°]                  | 57.14                 |
| <i>Reflections collected</i>                | 29485                 |
| <i>Independent reflections</i>              | 18737                 |
| <i>Parameters</i>                           | 1370                  |
| $R_1$ [ $I > 2\sigma(I)$ ]                  | 0.1765                |
| $wR_2$ [all data]                           | 0.2590                |
| <i>GOF</i>                                  | 1.027                 |
| <i>CCDC number</i>                          | 1962384               |

## 5. References

1 C. White, A. Yates, P. M. Maitlis, D. M. Heinekey, *Inorg. Synth.* 1992, **29**, 228–234.

2 (a) L. Fielding, *Tetrahedron* 2000, **56**, 6151–6170. (b) Y. Kikuchi, Y. Kato, Y. Tanaka, H. Toi and Y. Aoyama, *J. Am. Chem. Soc.* 1991, **113**, 1349–1354.
